# Supplementary material for: PERK Is a Haploinsufficient Tumor Suppressor: Gene Dose Determines Tumor-Suppressive Versus Tumor Promoting Properties of PERK in Melanoma
Source: PubMed Central journal article supplement (PMC5207760; doi:10.1371/journal.pgen.1006518), 2016-12-15
Supplement: pgen.1006518.s004.pdf [file pgen.1006518.s004.pdf]

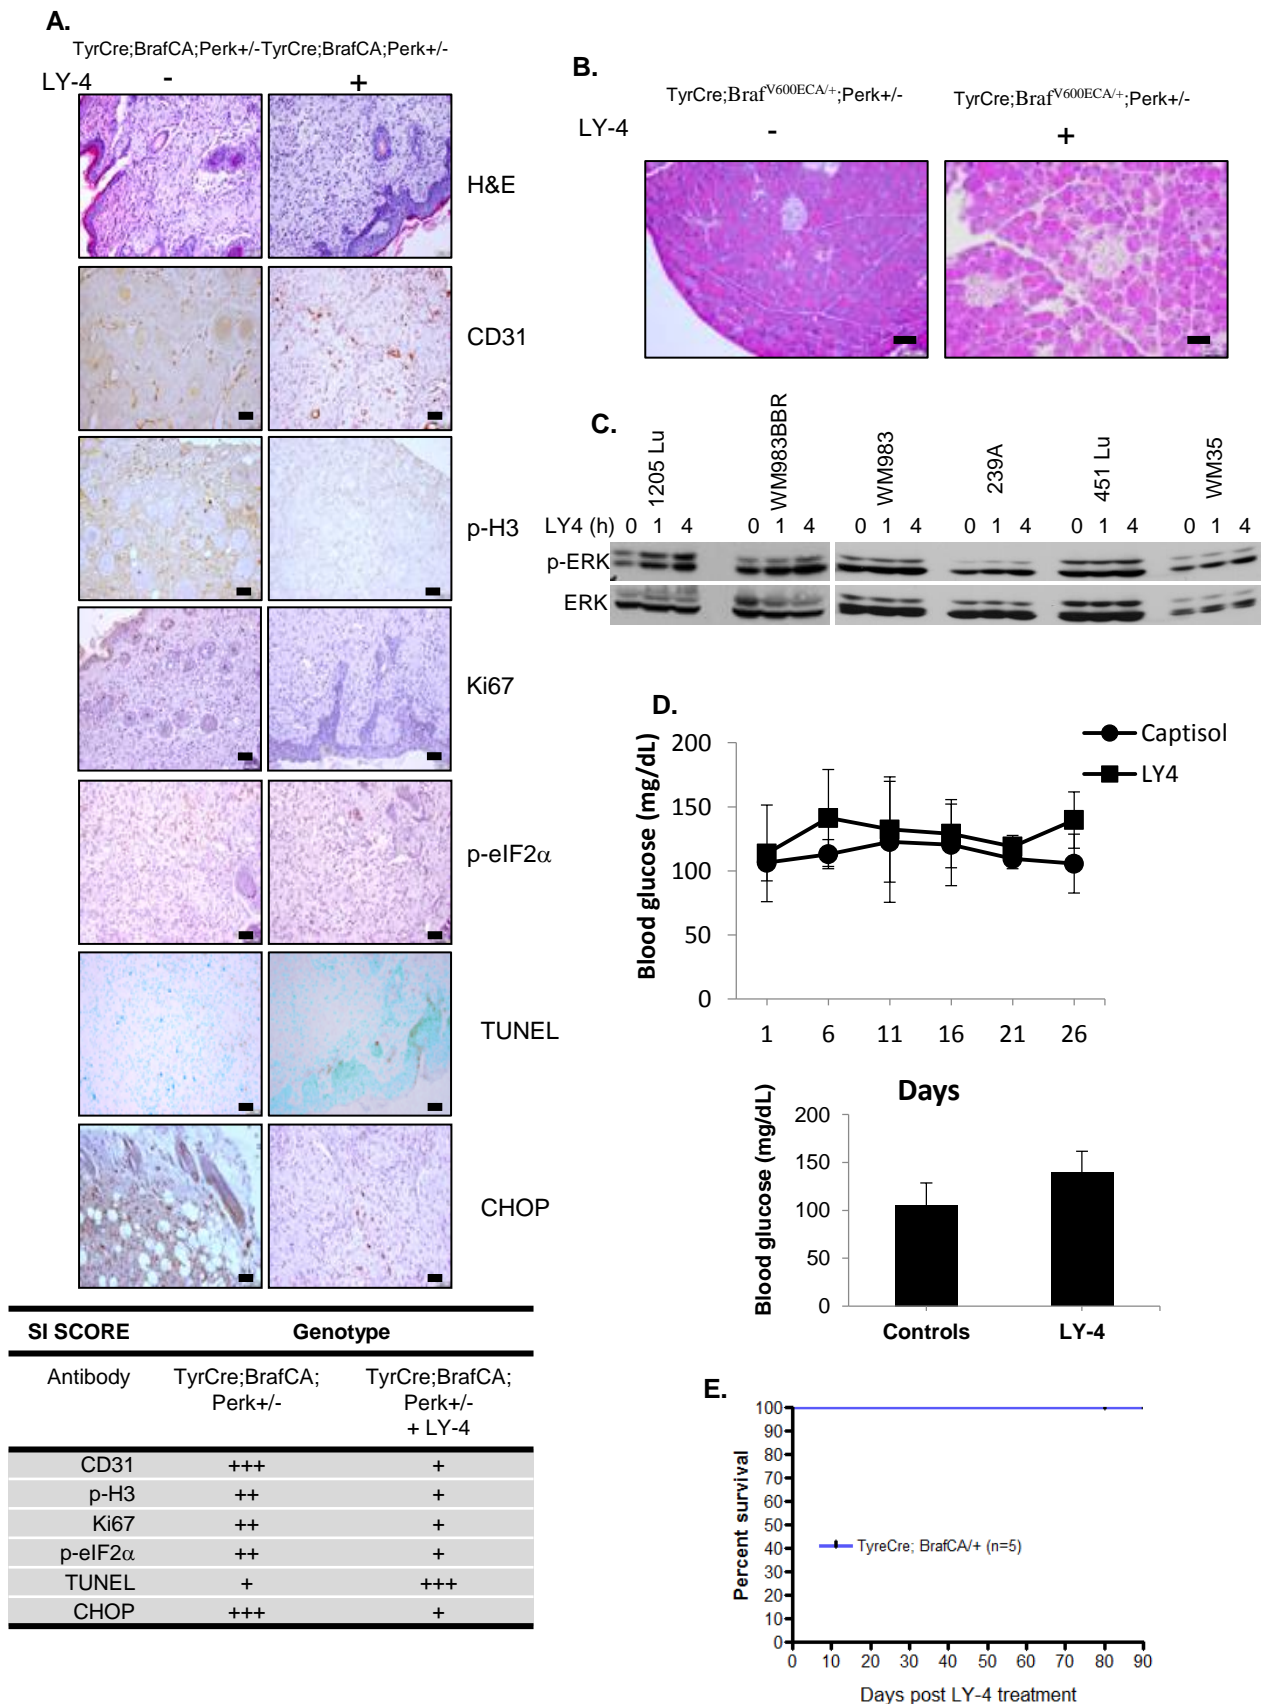

**S3 Fig.** Related to Figure 4.

**A)** H&E and IHC analysis of Braf<sup>V600ECA+/-</sup>/Perk+/- skin +/-LY-4, scale bars, 50  $\mu$ m. **B)** H&E of pancreas from control or LY-4 treated mice. **C)** LY-4 does not inhibit MAPK. **D)** Blood glucose levels +/- LY4; p-values analyzed by two-tailed Student t test. **E)** Survival curve of TyrCre; BrafCA/+ mice post LY-4 treatment.
