# Supplementary material for: PERK Is a Haploinsufficient Tumor Suppressor: Gene Dose Determines Tumor-Suppressive Versus Tumor Promoting Properties of PERK in Melanoma
Source: PubMed Central journal article supplement (PMC5207760; doi:10.1371/journal.pgen.1006518), 2016-12-15
Supplement: pgen.1006518.s007.pdf [file pgen.1006518.s007.pdf]

**A.**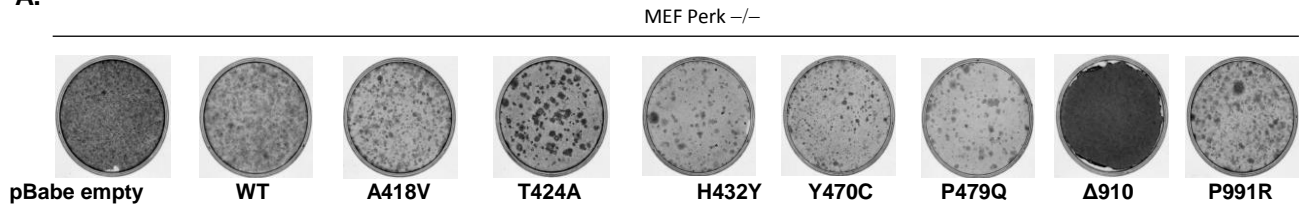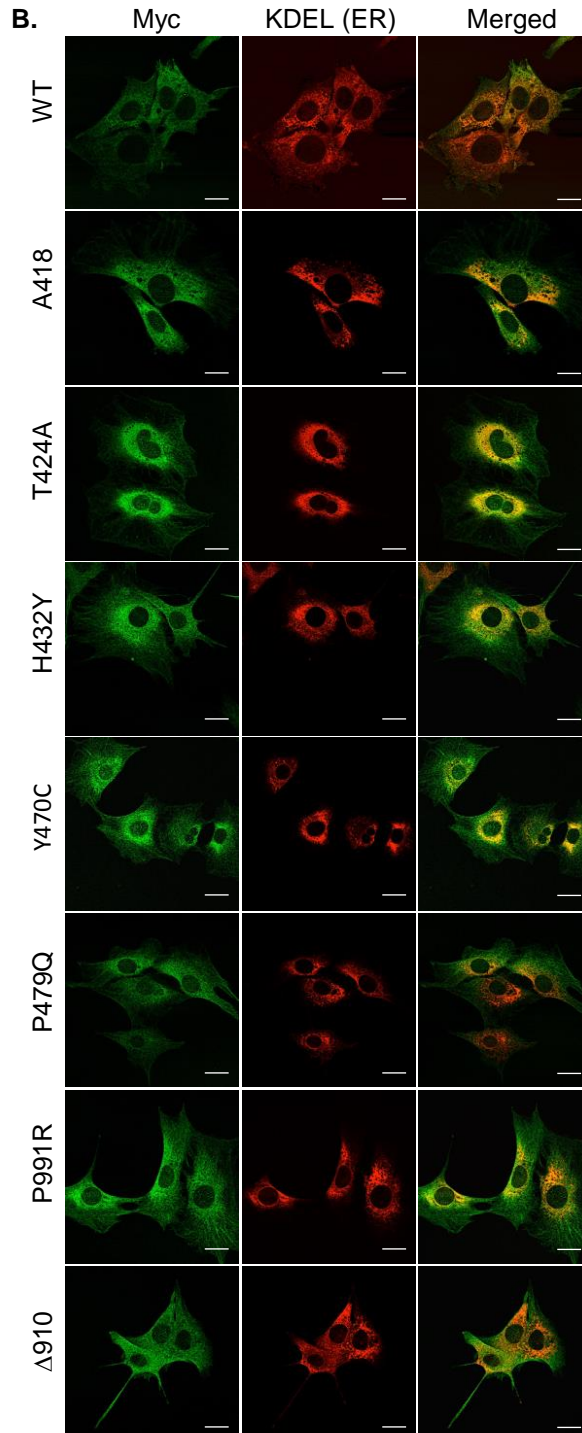

**S6 Fig.** Perk mutants possess ability to form colonies and localize into ER, Related to Figure 7.

**A)** Focus assay of Perk mutants in MEF's stable cell lines (Giemsa staining) **B)** Fluorescence localization assay Perk (green), ER (red), scale bars, 20  $\mu$ m.
