# Supplementary material for: PERK Is a Haploinsufficient Tumor Suppressor: Gene Dose Determines Tumor-Suppressive Versus Tumor Promoting Properties of PERK in Melanoma
Source: PubMed Central journal article supplement (PMC5207760; doi:10.1371/journal.pgen.1006518), 2016-12-15
Supplement: pgen.1006518.s009.pdf [file pgen.1006518.s009.pdf]

S2 Table. DiscoverX Kinase Selectivity analyze

| KINOMEScan Gene Symbol        | Entrez Gene Symbol | LY-4        |           |            |
|-------------------------------|--------------------|-------------|-----------|------------|
|                               |                    | 0.2 $\mu$ M | 2 $\mu$ M | 20 $\mu$ M |
| AAK1                          | AAK1               | 41          | 25        | 5          |
| ABL1(E255K)-phosphorylated    | ABL1               | 0           | 51        | 0          |
| ABL1(F317I)-nonphosphorylated | ABL1               | 33          | 26        | 22         |
| ABL1(F317I)-phosphorylated    | ABL1               | 30          | 20        | 18         |
| ABL1(F317L)-nonphosphorylated | ABL1               | 19          | 23        | 40         |
| ABL1(F317L)-phosphorylated    | ABL1               | 0           | 0         | 42         |
| ABL1(H396P)-nonphosphorylated | ABL1               | 0           | 76        | 29         |
| ABL1(H396P)-phosphorylated    | ABL1               | 0           | 41        | 0          |
| ABL1(M351T)-phosphorylated    | ABL1               | 0           | 45        | 25         |
| ABL1(Q252H)-nonphosphorylated | ABL1               | 46          | 91        | 0          |
| ABL1(Q252H)-phosphorylated    | ABL1               | 39          | 43        | 32         |
| ABL1(T315I)-nonphosphorylated | ABL1               | 30          | 7         | 5          |
| ABL1(T315I)-phosphorylated    | ABL1               | 0           | 0         | 0          |
| ABL1(Y253F)-phosphorylated    | ABL1               | 0           | 26        | 29         |
| ABL1-nonphosphorylated        | ABL1               | 10          | 69        | 3          |
| ABL1-phosphorylated           | ABL1               | 0           | 30        | 32         |
| ABL2                          | ABL2               | 0           | 0         | 0          |
| ACVR1                         | ACVR1              | 0           | 4         | 57         |
| ACVR1B                        | ACVR1B             | 27          | 14        | 0          |
| ACVR2A                        | ACVR2A             | 3           | 45        | 68         |
| ACVR2B                        | ACVR2B             | 0           | 45        | 68         |
| ACVRL1                        | ACVRL1             | 0           | 18        | 12         |
| ADCK3                         | CABC1              | 0           | 7         | 29         |
| ADCK4                         | ADCK4              | 28          | 22        | 23         |
| AKT1                          | AKT1               | 0           | 5         | 0          |
| AKT2                          | AKT2               | 0           | 0         | 0          |
| AKT3                          | AKT3               | 0           | 0         | 13         |
| ALK                           | ALK                | 0           | 0         | 77         |
| ALK(C1156Y)                   | ALK                | 0           | 0         | 15         |
| ALK(L1196M)                   | ALK                | 28          | 0         | 36         |
| AMPK-alpha1                   | PRKAA1             | 0           | 0         | 0          |
| AMPK-alpha2                   | PRKAA2             | 0           | 0         | 7          |
| ANKK1                         | ANKK1              | 29          | 14        | 48         |
| ARK5                          | NUAK1              | 0           | 0         | 23         |
| ASK1                          | MAP3K5             | 39          | 45        | 31         |
| ASK2                          | MAP3K6             | 0           | 0         | 0          |
| AURKA                         | AURKA              | 0           | 32        | 47         |
| AURKB                         | AURKB              | 0           | 0         | 2          |
| AURKC                         | AURKC              | 18          | 3         | 21         |
| AXL                           | AXL                | 20          | 7         | 0          |
| BIKE                          | BMP2K              | 14          | 0         | 30         |
| BLK                           | BLK                | 20          | 12        | 45         |
| BMPR1A                        | BMPR1A             | 53          | 50        | 61         |
| BMPR1B                        | BMPR1B             | 0           | 26        | 81         |
| BMPR2                         | BMPR2              | 9           | 7         | 26         |
| BMX                           | BMX                | 8           | 31        | 34         |
| BRAF                          | BRAF               | 0           | 13        | 19         |
| BRAF(V600E)                   | BRAF               | 0           | 12        | 30         |
| BRK                           | PTK6               | 0           | 0         | 3          |
| BRSK1                         | BRSK1              | 0           | 1         | 5          |
| BRSK2                         | BRSK2              | 9           | 23        | 0          |
| BTK                           | BTK                | 0           | 0         | 0          |
| BUB1                          | BUB1               | 18          | 0         | 0          |
| CAMK1                         | CAMK1              | 39          | 16        | 43         |
| CAMK1D                        | CAMK1D             | 20          | 12        | 25         |
| CAMK1G                        | CAMK1G             | 34          | 23        | 0          |
| CAMK2A                        | CAMK2A             | 13          | 0         | 64         |

|                     |          |    |    |    |
|---------------------|----------|----|----|----|
| CAMK2B              | CAMK2B   | 37 | 0  | 70 |
| CAMK2D              | CAMK2D   | 18 | 0  | 5  |
| CAMK2G              | CAMK2G   | 40 | 43 | 28 |
| CAMK4               | CAMK4    | 0  | 18 | 0  |
| CAMKK1              | CAMKK1   | 0  | 0  | 0  |
| CAMKK2              | CAMKK2   | 56 | 52 | 24 |
| CASK                | CASK     | 73 | 9  | 42 |
| CDC2L1              | CDK11B   | 0  | 0  | 14 |
| CDC2L2              | CDC2L2   | 27 | 10 | 24 |
| CDC2L5              | CDK13    | 0  | 4  | 7  |
| CDK11               | CDK19    | 1  | 2  | 0  |
| CDK2                | CDK2     | 16 | 12 | 0  |
| CDK3                | CDK3     | 6  | 14 | 25 |
| CDK4-cyclinD1       | CDK4     | 0  | 4  | 5  |
| CDK4-cyclinD3       | CDK4     | 0  | 41 | 24 |
| CDK5                | CDK5     | 0  | 0  | 0  |
| CDK7                | CDK7     | 0  | 0  | 0  |
| CDK8                | CDK8     | 30 | 0  | 0  |
| CDK9                | CDK9     | 0  | 0  | 0  |
| CDKL1               | CDKL1    | 31 | 0  | 0  |
| CDKL2               | CDKL2    | 2  | 0  | 0  |
| CDKL3               | CDKL3    | 9  | 0  | 0  |
| CDKL5               | CDKL5    | 17 | 0  | 0  |
| CHEK1               | CHEK1    | 18 | 44 | 21 |
| CHEK2               | CHEK2    | 0  | 0  | 1  |
| CIT                 | CIT      | 5  | 0  | 0  |
| CLK1                | CLK1     | 7  | 8  | 45 |
| CLK2                | CLK2     | 6  | 0  | 35 |
| CLK3                | CLK3     | 15 | 15 | 0  |
| CLK4                | CLK4     | 4  | 0  | 34 |
| CSF1R               | CSF1R    | 0  | 5  | 0  |
| CSF1R-autoinhibited | CSF1R    | 0  | 0  | 0  |
| CSK                 | CSK      | 31 | 0  | 14 |
| CSNK1A1             | CSNK1A1  | 2  | 0  | 53 |
| CSNK1A1L            | CSNK1A1L | 0  | 15 | 64 |
| CSNK1D              | CSNK1D   | 27 | 17 | 26 |
| CSNK1E              | CSNK1E   | 0  | 0  | 17 |
| CSNK1G1             | CSNK1G1  | 2  | 0  | 8  |
| CSNK1G2             | CSNK1G2  | 12 | 39 | 63 |
| CSNK1G3             | CSNK1G3  | 17 | 0  | 14 |
| CSNK2A1             | CSNK2A1  | 66 | 58 | 70 |
| CSNK2A2             | CSNK2A2  | 0  | 26 | 46 |
| CTK                 | MATK     | 35 | 0  | 18 |
| DAPK1               | DAPK1    | 0  | 15 | 12 |
| DAPK2               | DAPK2    | 22 | 32 | 56 |
| DAPK3               | DAPK3    | 14 | 0  | 0  |
| DCAMKL1             | DCLK1    | 0  | 78 | 47 |
| DCAMKL2             | DCLK2    | 0  | 0  | 0  |
| DCAMKL3             | DCLK3    | 0  | 0  | 26 |
| DDR1                | DDR1     | 18 | 27 | 17 |
| DDR2                | DDR2     | 4  | 0  | 0  |
| DLK                 | MAP3K12  | 0  | 0  | 0  |
| DMPK                | DMPK     | 14 | 19 | 56 |
| DMPK2               | CDC42BPG | 0  | 0  | 14 |
| DRAK1               | STK17A   | 0  | 0  | 0  |
| DRAK2               | STK17B   | 22 | 0  | 0  |
| DYRK1A              | DYRK1A   | 26 | 11 | 45 |
| DYRK1B              | DYRK1B   | 25 | 19 | 35 |
| DYRK2               | DYRK2    | 18 | 0  | 20 |
| EGFR                | EGFR     | 30 | 23 | 16 |
| EGFR(E746-A750del)  | EGFR     | 33 | 38 | 55 |
| EGFR(G719C)         | EGFR     | 0  | 0  | 0  |

|                           |         |    |    |    |
|---------------------------|---------|----|----|----|
| EGFR(G719S)               | EGFR    | 0  | 0  | 0  |
| EGFR(L747-E749del, A750P) | EGFR    | 48 | 25 | 32 |
| EGFR(L747-S752del, P753S) | EGFR    | 39 | 30 | 43 |
| EGFR(L747-T751del,Sins)   | EGFR    | 0  | 3  | 16 |
| EGFR(L858R)               | EGFR    | 18 | 25 | 30 |
| EGFR(L858R,T790M)         | EGFR    | 16 | 30 | 28 |
| EGFR(L861Q)               | EGFR    | 0  | 0  | 5  |
| EGFR(S752-I759del)        | EGFR    | 0  | 0  | 0  |
| EGFR(T790M)               | EGFR    | 0  | 0  | 0  |
| EIF2AK1                   | EIF2AK1 | 0  | 0  | 35 |
| EPHA1                     | EPHA1   | 37 | 36 | 53 |
| EPHA2                     | EPHA2   | 18 | 21 | 40 |
| EPHA3                     | EPHA3   | 13 | 16 | 0  |
| EPHA4                     | EPHA4   | 34 | 0  | 31 |
| EPHA5                     | EPHA5   | 0  | 0  | 0  |
| EPHA6                     | EPHA6   | 15 | 0  | 43 |
| EPHA7                     | EPHA7   | 1  | 0  | 6  |
| EPHA8                     | EPHA8   | 6  | 0  | 0  |
| EPHB1                     | EPHB1   | 4  | 2  | 1  |
| EPHB2                     | EPHB2   | 4  | 0  | 12 |
| EPHB3                     | EPHB3   | 7  | 1  | 16 |
| EPHB4                     | EPHB4   | 24 | 0  | 4  |
| EPHB6                     | EPHB6   | 20 | 7  | 42 |
| ERBB2                     | ERBB2   | 0  | 0  | 0  |
| ERBB3                     | ERBB3   | 0  | 0  | 0  |
| ERBB4                     | ERBB4   | 0  | 0  | 4  |
| ERK1                      | MAPK3   | 2  | 18 | 0  |
| ERK2                      | MAPK1   | 0  | 0  | 1  |
| ERK3                      | MAPK6   | 0  | 32 | 3  |
| ERK4                      | MAPK4   | 0  | 0  | 0  |
| ERK5                      | MAPK7   | 0  | 0  | 4  |
| ERK8                      | MAPK15  | 0  | 0  | 0  |
| ERN1                      | ERN1    | 0  | 9  | 40 |
| FAK                       | PTK2    | 8  | 10 | 0  |
| FER                       | FER     | 11 | 18 | 10 |
| FES                       | FES     | 13 | 0  | 23 |
| FGFR1                     | FGFR1   | 5  | 0  | 0  |
| FGFR2                     | FGFR2   | 0  | 15 | 19 |
| FGFR3                     | FGFR3   | 27 | 29 | 30 |
| FGFR3(G697C)              | FGFR3   | 32 | 8  | 24 |
| FGFR4                     | FGFR4   | 24 | 6  | 3  |
| FGR                       | FGR     | 11 | 0  | 22 |
| FLT1                      | FLT1    | 27 | 18 | 35 |
| FLT3                      | FLT3    | 0  | 0  | 23 |
| FLT3(D835H)               | FLT3    | 57 | 2  | 20 |
| FLT3(D835Y)               | FLT3    | 17 | 3  | 22 |
| FLT3(ITD)                 | FLT3    | 0  | 0  | 18 |
| FLT3(K663Q)               | FLT3    | 0  | 0  | 15 |
| FLT3(N841I)               | FLT3    | 60 | 53 | 59 |
| FLT3(R834Q)               | FLT3    | 4  | 3  | 6  |
| FLT3-autoinhibited        | FLT3    | 36 | 0  | 0  |
| FLT4                      | FLT4    | 30 | 4  | 0  |
| FRK                       | FRK     | 8  | 6  | 12 |
| FYN                       | FYN     | 8  | 0  | 12 |
| GAK                       | GAK     | 0  | 0  | 11 |
| GCN2(Kin.Dom.2,S808G)     | EIF2AK4 | 0  | 0  | 28 |
| GRK1                      | GRK1    | 70 | 54 | 78 |
| GRK4                      | GRK4    | 13 | 1  | 0  |
| GRK7                      | GRK7    | 0  | 0  | 0  |
| GSK3A                     | GSK3A   | 0  | 0  | 0  |
| GSK3B                     | GSK3B   | 0  | 17 | 41 |
| HASPIN                    | GSG2    | 9  | 46 | 84 |

|                              |          |    |    |    |
|------------------------------|----------|----|----|----|
| HCK                          | HCK      | 0  | 0  | 16 |
| HIPK1                        | HIPK1    | 0  | 21 | 33 |
| HIPK2                        | HIPK2    | 0  | 0  | 45 |
| HIPK3                        | HIPK3    | 0  | 4  | 43 |
| HIPK4                        | HIPK4    | 22 | 53 | 83 |
| HPK1                         | MAP4K1   | 50 | 0  | 32 |
| HUNK                         | HUNK     | 0  | 0  | 0  |
| ICK                          | ICK      | 34 | 6  | 46 |
| IGF1R                        | IGF1R    | 0  | 0  | 0  |
| IKK-alpha                    | CHUK     | 0  | 0  | 15 |
| IKK-beta                     | IKBKB    | 0  | 0  | 0  |
| IKK-epsilon                  | IKBKE    | 43 | 0  | 19 |
| INSR                         | INSR     | 0  | 0  | 0  |
| INSRR                        | INSRR    | 33 | 14 | 40 |
| IRAK1                        | IRAK1    | 0  | 0  | 6  |
| IRAK3                        | IRAK3    | 24 | 40 | 61 |
| IRAK4                        | IRAK4    | 0  | 0  | 2  |
| ITK                          | ITK      | 10 | 8  | 0  |
| JAK1(JH1domain-catalytic)    | JAK1     | 0  | 0  | 0  |
| JAK1(JH2domain-pseudokinase) | JAK1     | 78 | 67 | 11 |
| JAK2(JH1domain-catalytic)    | JAK2     | 26 | 42 | 36 |
| JAK3(JH1domain-catalytic)    | JAK3     | 24 | 0  | 0  |
| JNK1                         | MAPK8    | 0  | 2  | 8  |
| JNK2                         | MAPK9    | 11 | 0  | 24 |
| JNK3                         | MAPK10   | 5  | 0  | 41 |
| KIT                          | KIT      | 9  | 23 | 19 |
| KIT(A829P)                   | KIT      | 0  | 0  | 0  |
| KIT(D816H)                   | KIT      | 0  | 0  | 0  |
| KIT(D816V)                   | KIT      | 0  | 16 | 42 |
| KIT(L576P)                   | KIT      | 6  | 30 | 21 |
| KIT(V559D)                   | KIT      | 0  | 26 | 36 |
| KIT(V559D,T670I)             | KIT      | 0  | 6  | 20 |
| KIT(V559D,V654A)             | KIT      | 23 | 0  | 0  |
| KIT-autoinhibited            | KIT      | 69 | 52 | 5  |
| LATS1                        | LATS1    | 6  | 7  | 7  |
| LATS2                        | LATS2    | 0  | 0  | 14 |
| LCK                          | LCK      | 9  | 0  | 5  |
| LIMK1                        | LIMK1    | 0  | 0  | 0  |
| LIMK2                        | LIMK2    | 20 | 0  | 30 |
| LKB1                         | STK11    | 22 | 0  | 31 |
| LOK                          | STK10    | 0  | 0  | 53 |
| LRRK2                        | LRRK2    | 2  | 6  | 8  |
| LRRK2(G2019S)                | LRRK2    | 0  | 0  | 0  |
| LTK                          | LTK      | 38 | 0  | 45 |
| LYN                          | LYN      | 19 | 14 | 26 |
| LZK                          | MAP3K13  | 0  | 0  | 0  |
| MAK                          | MAK      | 0  | 0  | 0  |
| MAP3K1                       | MAP3K1   | 14 | 0  | 25 |
| MAP3K15                      | MAP3K15  | 4  | 3  | 27 |
| MAP3K2                       | MAP3K2   | 13 | 66 | 91 |
| MAP3K3                       | MAP3K3   | 0  | 12 | 78 |
| MAP3K4                       | MAP3K4   | 37 | 20 | 37 |
| MAP4K2                       | MAP4K2   | 53 | 0  | 65 |
| MAP4K3                       | MAP4K3   | 4  | 5  | 50 |
| MAP4K4                       | MAP4K4   | 3  | 14 | 8  |
| MAP4K5                       | MAP4K5   | 0  | 29 | 31 |
| MAPKAPK2                     | MAPKAPK2 | 17 | 11 | 0  |
| MAPKAPK5                     | MAPKAPK5 | 0  | 0  | 0  |
| MARK1                        | MARK1    | 15 | 0  | 0  |
| MARK2                        | MARK2    | 0  | 0  | 0  |
| MARK3                        | MARK3    | 0  | 0  | 0  |
| MARK4                        | MARK4    | 19 | 0  | 0  |

|             |          |    |    |    |
|-------------|----------|----|----|----|
| MAST1       | MAST1    | 9  | 0  | 34 |
| MEK1        | MAP2K1   | 0  | 0  | 11 |
| MEK2        | MAP2K2   | 0  | 0  | 21 |
| MEK3        | MAP2K3   | 9  | 22 | 20 |
| MEK4        | MAP2K4   | 73 | 36 | 62 |
| MEK5        | MAP2K5   | 34 | 24 | 35 |
| MEK6        | MAP2K6   | 9  | 0  | 14 |
| MELK        | MELK     | 56 | 29 | 45 |
| MERTK       | MERTK    | 2  | 7  | 45 |
| MET         | MET      | 0  | 12 | 5  |
| MET(M1250T) | MET      | 18 | 14 | 0  |
| MET(Y1235D) | MET      | 21 | 25 | 0  |
| MINK        | MINK1    | 38 | 21 | 68 |
| MKK7        | MAP2K7   | 0  | 0  | 17 |
| MKNK1       | MKNK1    | 0  | 0  | 2  |
| MKNK2       | MKNK2    | 0  | 0  | 21 |
| MLCK        | MYLK3    | 6  | 0  | 0  |
| MLK1        | MAP3K9   | 0  | 0  | 0  |
| MLK2        | MAP3K10  | 0  | 0  | 0  |
| MLK3        | MAP3K11  | 0  | 0  | 0  |
| MRCKA       | CDC42BPA | 0  | 0  | 0  |
| MRCKB       | CDC42BPB | 4  | 6  | 10 |
| MST1        | STK4     | 0  | 0  | 18 |
| MST1R       | MST1R    | 0  | 0  | 0  |
| MST2        | STK3     | 15 | 33 | 27 |
| MST3        | STK24    | 35 | 46 | 47 |
| MST4        | MST4     | 0  | 0  | 0  |
| MTOR        | MTOR     | 0  | 0  | 0  |
| MUSK        | MUSK     | 10 | 20 | 19 |
| MYLK        | MYLK     | 1  | 2  | 9  |
| MYLK2       | MYLK2    | 4  | 16 | 0  |
| MYLK4       | MYLK4    | 0  | 0  | 0  |
| MYO3A       | MYO3A    | 0  | 44 | 48 |
| MYO3B       | MYO3B    | 0  | 0  | 12 |
| NDR1        | STK38    | 0  | 0  | 0  |
| NDR2        | STK38L   | 0  | 0  | 0  |
| NEK1        | NEK1     | 0  | 5  | 22 |
| NEK10       | NEK10    | 2  | 15 | 59 |
| NEK11       | NEK11    | 0  | 8  | 1  |
| NEK2        | NEK2     | 0  | 0  | 2  |
| NEK3        | NEK3     | 34 | 59 | 41 |
| NEK4        | NEK4     | 2  | 7  | 5  |
| NEK5        | NEK5     | 0  | 0  | 0  |
| NEK6        | NEK6     | 0  | 0  | 0  |
| NEK7        | NEK7     | 6  | 27 | 0  |
| NEK9        | NEK9     | 0  | 1  | 8  |
| NIK         | MAP3K14  | 0  | 0  | 0  |
| NIM1        | MGC42105 | 23 | 46 | 55 |
| NLK         | NLK      | 0  | 0  | 0  |
| OSR1        | OXR1     | 3  | 13 | 6  |
| p38-alpha   | MAPK14   | 0  | 0  | 0  |
| p38-beta    | MAPK11   | 30 | 27 | 0  |
| p38-delta   | MAPK13   | 0  | 0  | 0  |
| p38-gamma   | MAPK12   | 0  | 3  | 5  |
| PAK1        | PAK1     | 8  | 12 | 24 |
| PAK2        | PAK2     | 27 | 0  | 2  |
| PAK3        | PAK3     | 22 | 0  | 2  |
| PAK4        | PAK4     | 30 | 21 | 11 |
| PAK6        | PAK6     | 39 | 15 | 19 |
| PAK7        | PAK7     | 10 | 13 | 0  |
| PCTK1       | CDK16    | 16 | 18 | 2  |
| PCTK2       | CDK17    | 0  | 0  | 0  |

|                       |             |    |    |    |
|-----------------------|-------------|----|----|----|
| PCTK3                 | CDK18       | 5  | 10 | 0  |
| PDGFRA                | PDGFRA      | 26 | 0  | 0  |
| PDGFRB                | PDGFRB      | 0  | 33 | 24 |
| PDPK1                 | PDPK1       | 1  | 0  | 0  |
| PFCDPK1(P.falciparum) | CDPK1       | 42 | 0  | 47 |
| PFPK5(P.falciparum)   | MAL13P1.279 | 30 | 0  | 16 |
| PFTAIRE2              | CDK15       | 0  | 17 | 20 |
| PFTK1                 | CDK14       | 0  | 0  | 0  |
| PHKG1                 | PHKG1       | 13 | 18 | 0  |
| PHKG2                 | PHKG2       | 0  | 0  | 17 |
| PIK3C2B               | PIK3C2B     | 40 | 39 | 94 |
| PIK3C2G               | PIK3C2G     | 18 | 24 | 15 |
| PIK3CA                | PIK3CA      | 9  | 0  | 8  |
| PIK3CA(C420R)         | PIK3CA      | 20 | 0  | 29 |
| PIK3CA(E542K)         | PIK3CA      | 15 | 0  | 52 |
| PIK3CA(E545A)         | PIK3CA      | 0  | 0  | 19 |
| PIK3CA(E545K)         | PIK3CA      | 34 | 10 | 29 |
| PIK3CA(H1047L)        | PIK3CA      | 0  | 0  | 35 |
| PIK3CA(H1047Y)        | PIK3CA      | 36 | 0  | 62 |
| PIK3CA(I800L)         | PIK3CA      | 9  | 6  | 59 |
| PIK3CA(M1043I)        | PIK3CA      | 0  | 0  | 0  |
| PIK3CA(Q546K)         | PIK3CA      | 26 | 12 | 0  |
| PIK3CB                | PIK3CB      | 0  | 0  | 12 |
| PIK3CD                | PIK3CD      | 0  | 0  | 0  |
| PIK3CG                | PIK3CG      | 24 | 0  | 26 |
| PIK4CB                | PI4KB       | 15 | 25 | 36 |
| PIM1                  | PIM1        | 0  | 0  | 0  |
| PIM2                  | PIM2        | 0  | 1  | 0  |
| PIM3                  | PIM3        | 0  | 0  | 0  |
| PIP5K1A               | PIP5K1A     | 52 | 35 | 25 |
| PIP5K1C               | PIP5K1C     | 0  | 0  | 0  |
| PIP5K2B               | PIP4K2B     | 18 | 19 | 4  |
| PIP5K2C               | PIP4K2C     | 0  | 0  | 0  |
| PKAC-alpha            | PRKACA      | 4  | 0  | 0  |
| PKAC-beta             | PRKACB      | 15 | 0  | 0  |
| PKMYT1                | PKMYT1      | 0  | 17 | 2  |
| PKN1                  | PKN1        | 4  | 25 | 42 |
| PKN2                  | PKN2        | 98 | 4  | 12 |
| PKNB(M.tuberculosis)  | pknB        | 0  | 0  | 0  |
| PLK1                  | PLK1        | 32 | 35 | 29 |
| PLK2                  | PLK2        | 21 | 26 | 40 |
| PLK3                  | PLK3        | 39 | 49 | 33 |
| PLK4                  | PLK4        | 17 | 56 | 54 |
| PRKCD                 | PRKCD       | 13 | 34 | 11 |
| PRKCE                 | PRKCE       | 0  | 0  | 0  |
| PRKCH                 | PRKCH       | 18 | 14 | 28 |
| PRKCI                 | PRKCI       | 37 | 0  | 40 |
| PRKCQ                 | PRKCQ       | 10 | 32 | 18 |
| PRKD1                 | PRKD1       | 0  | 0  | 0  |
| PRKD2                 | PRKD2       | 0  | 0  | 0  |
| PRKD3                 | PRKD3       | 12 | 46 | 35 |
| PRKG1                 | PRKG1       | 8  | 4  | 9  |
| PRKG2                 | PRKG2       | 34 | 0  | 20 |
| PRKR                  | EIF2AK2     | 0  | 0  | 0  |
| PRKX                  | PRKX        | 0  | 24 | 8  |
| PRP4                  | PRPF4B      | 33 | 0  | 34 |
| PYK2                  | PTK2B       | 0  | 0  | 6  |
| QSK                   | KIAA0999    | 0  | 0  | 17 |
| RAF1                  | RAF1        | 33 | 7  | 22 |
| RET                   | RET         | 0  | 0  | 0  |
| RET(M918T)            | RET         | 0  | 0  | 0  |
| RET(V804L)            | RET         | 8  | 0  | 0  |

|                               |         |    |    |    |
|-------------------------------|---------|----|----|----|
| RET(V804M)                    | RET     | 1  | 5  | 1  |
| RIOK1                         | RIOK1   | 39 | 0  | 13 |
| RIOK2                         | RIOK2   | 0  | 26 | 48 |
| RIOK3                         | RIOK3   | 20 | 16 | 23 |
| RIPK1                         | RIPK1   | 0  | 0  | 0  |
| RIPK2                         | RIPK2   | 47 | 56 | 56 |
| RIPK4                         | RIPK4   | 18 | 4  | 34 |
| RIPK5                         | DSTYK   | 30 | 8  | 72 |
| ROCK1                         | ROCK1   | 0  | 0  | 0  |
| ROCK2                         | ROCK2   | 0  | 0  | 0  |
| ROS1                          | ROS1    | 3  | 0  | 31 |
| RPS6KA4(Kin.Dom.1-N-terminal) | RPS6KA4 | 2  | 0  | 6  |
| RPS6KA4(Kin.Dom.2-C-terminal) | RPS6KA4 | 0  | 0  | 0  |
| RPS6KA5(Kin.Dom.1-N-terminal) | RPS6KA5 | 0  | 16 | 12 |
| RPS6KA5(Kin.Dom.2-C-terminal) | RPS6KA5 | 0  | 0  | 0  |
| RSK1(Kin.Dom.1-N-terminal)    | RPS6KA1 | 15 | 17 | 4  |
| RSK1(Kin.Dom.2-C-terminal)    | RPS6KA1 | 0  | 4  | 0  |
| RSK2(Kin.Dom.1-N-terminal)    | RPS6KA3 | 48 | 45 | 65 |
| RSK2(Kin.Dom.2-C-terminal)    | RPS6KA3 | 3  | 0  | 0  |
| RSK3(Kin.Dom.1-N-terminal)    | RPS6KA2 | 10 | 7  | 33 |
| RSK3(Kin.Dom.2-C-terminal)    | RPS6KA2 | 28 | 6  | 19 |
| RSK4(Kin.Dom.1-N-terminal)    | RPS6KA6 | 47 | 67 | 63 |
| RSK4(Kin.Dom.2-C-terminal)    | RPS6KA6 | 24 | 20 | 40 |
| S6K1                          | RPS6KB1 | 31 | 0  | 24 |
| SBK1                          | SBK1    | 19 | 18 | 20 |
| SGK                           | SGK1    | 0  | 0  | 0  |
| SgK110                        | SgK110  | 18 | 18 | 6  |
| SGK2                          | SGK2    | 7  | 12 | 22 |
| SGK3                          | SGK3    | 0  | 0  | 0  |
| SIK                           | SIK1    | 14 | 0  | 0  |
| SIK2                          | SIK2    | 10 | 7  | 18 |
| SLK                           | SLK     | 8  | 0  | 54 |
| SNARK                         | NUAK2   | 0  | 0  | 10 |
| SNRK                          | SNRK    | 38 | 0  | 0  |
| SRC                           | SRC     | 0  | 1  | 11 |
| SRMS                          | SRMS    | 70 | 14 | 62 |
| SRPK1                         | SRPK1   | 76 | 81 | 43 |
| SRPK2                         | SRPK2   | 0  | 0  | 11 |
| SRPK3                         | SRPK3   | 0  | 7  | 0  |
| STK16                         | STK16   | 24 | 3  | 0  |
| STK33                         | STK33   | 30 | 37 | 45 |
| STK35                         | STK35   | 0  | 0  | 12 |
| STK36                         | STK36   | 22 | 3  | 14 |
| STK39                         | STK39   | 11 | 0  | 15 |
| SYK                           | SYK     | 0  | 0  | 0  |
| TAK1                          | MAP3K7  | 0  | 0  | 46 |
| TAOK1                         | TAOK1   | 53 | 0  | 61 |
| TAOK2                         | TAOK2   | 82 | 0  | 62 |
| TAOK3                         | TAOK3   | 15 | 0  | 37 |
| TBK1                          | TBK1    | 36 | 32 | 66 |
| TEC                           | TEC     | 16 | 12 | 0  |
| TESK1                         | TESK1   | 34 | 16 | 46 |
| TGFBR1                        | TGFBR1  | 0  | 5  | 18 |
| TGFBR2                        | TGFBR2  | 0  | 0  | 0  |
| TIE1                          | TIE1    | 22 | 17 | 35 |
| TIE2                          | TEK     | 18 | 3  | 0  |
| TLK1                          | TLK1    | 19 | 18 | 23 |
| TLK2                          | TLK2    | 38 | 24 | 39 |
| TNIK                          | TNIK    | 26 | 23 | 30 |
| TNK1                          | TNK1    | 14 | 0  | 23 |
| TNK2                          | TNK2    | 0  | 2  | 18 |
| TNNI3K                        | TNNI3K  | 0  | 17 | 0  |

|                              |        |    |    |    |
|------------------------------|--------|----|----|----|
| TRKA                         | NTRK1  | 1  | 3  | 5  |
| TRKB                         | NTRK2  | 0  | 9  | 20 |
| TRKC                         | NTRK3  | 0  | 0  | 22 |
| TRPM6                        | TRPM6  | 0  | 3  | 9  |
| TSSK1B                       | TSSK1B | 0  | 0  | 0  |
| TTK                          | TTK    | 36 | 0  | 0  |
| TXK                          | TXK    | 42 | 40 | 68 |
| TYK2(JH1domain-catalytic)    | TYK2   | 21 | 0  | 22 |
| TYK2(JH2domain-pseudokinase) | TYK2   | 0  | 0  | 0  |
| TYRO3                        | TYRO3  | 10 | 5  | 15 |
| ULK1                         | ULK1   | 0  | 4  | 42 |
| ULK2                         | ULK2   | 0  | 0  | 0  |
| ULK3                         | ULK3   | 0  | 5  | 20 |
| VEGFR2                       | KDR    | 0  | 0  | 0  |
| VRK2                         | VRK2   | 0  | 43 | 94 |
| WEE1                         | WEE1   | 0  | 23 | 5  |
| WEE2                         | WEE2   | 0  | 3  | 0  |
| WNK1                         | WNK1   | 0  | 0  | 26 |
| WNK3                         | WNK3   | 0  | 0  | 0  |
| YANK1                        | STK32A | 18 | 0  | 0  |
| YANK2                        | STK32B | 0  | 0  | 33 |
| YANK3                        | STK32C | 0  | 6  | 17 |
| YES                          | YES1   | 0  | 0  | 23 |
| YSK1                         | STK25  | 0  | 0  | 0  |
| YSK4                         | YSK4   | 0  | 50 | 93 |
| ZAK                          | ZAK    | 33 | 36 | 63 |
| ZAP70                        | ZAP70  | 0  | 0  | 0  |

Selectivity (# kinases inh >50%): 19 20 48
