# Supplementary material for: PERK Is a Haploinsufficient Tumor Suppressor: Gene Dose Determines Tumor-Suppressive Versus Tumor Promoting Properties of PERK in Melanoma
Source: PubMed Central journal article supplement (PMC5207760; doi:10.1371/journal.pgen.1006518), 2016-12-15
Supplement: pgen.1006518.s010.pdf [file pgen.1006518.s010.pdf]

S3 Table. p53 mutations detected in the Perk+/- mouse melanomas

| <b>p53 mutations</b> |
|----------------------|
| S149A                |
| T155S                |
| M246I                |
| R248Q                |
| R282W                |
